# Supplementary material for: Megadalton-node assembly by binding of Skb1 to the membrane anchor Slf1
Source: PubMed Central journal article supplement — Mol Biol Cell. 2014 Sep 1;25(17):2660–8. doi: 10.1091/mbc.E14-04-0896 (PMC4148255; doi:10.1091/mbc.e14-04-0896), 2014-09-01
Supplement: supp_E14-04-0896v1_CombinedSupMats.pdf [file supp_E14-04-0896v1_CombinedSupMats.pdf]

# Supplemental Materials

*Molecular Biology of the Cell*

Deng et al.

| Protein      | #Uni_Peptide | Coverage % |
|--------------|--------------|------------|
| Skb1         | 21           | 41.71      |
| SPAC821.03c  | 3            | 12.58      |
| Tdh1         | 2            | 12.2       |
| SPAC17H9.04c | 2            | 5.63       |
| Tif33        | 2            | 4.36       |
| Trp1         | 2            | 3.95       |
| Cdc48        | 2            | 3.75       |
| Rpa2         | 3            | 3.34       |
| Tif32        | 2            | 3.33       |
| Nup97        | 2            | 3.29       |
| SPAC18G6.05c | 3            | 1.39       |

**Supplemental Figure S1.** List of proteins that specifically co-purified with Skb1-3HA but not with untagged control.

|             |                                                                                                           |     |
|-------------|-----------------------------------------------------------------------------------------------------------|-----|
| Spombe.S1f1 | ESSIQNPIESSYFVLDLSAVGNSQLHSGRSLTYGDRKANIDTRSGGGRRFWSNLNDS..GNSFGAVPASSMNLSE...YGPFKSITISKDKGA             | 88  |
| Scryophilus | MNATVQAYNKPHFVGGSSNGISQKLRHAQSLVR..RQPAKVESDNGHRRRWSHYDDE..QNLGNAYHGEGDMEP...PKSGYSTQQLASFNKGR            | 89  |
| Soctosporus | MNEIYHDKYNTQAMSSSTRIPQRLRHAQSLFR..RRPTTVEPDSNHRRWSHYDNL..PNGVHSSYDANTVNPNASIKSGYSTQQLASLNRDR              | 92  |
| Sjaponicus  | MQTYQTEMVRLNDYIGGMQYSISAFTRKRSVSOQPKP..ESASQDEYELDRRBSFTWNLDEESTLNRRSRRTSATRSQTRSLRHQIELKELTLPSLD         | 98  |
| Spombe.S1f1 | MSRSSRYVSSLEKATLPLSLDGRRLSRNNAANHASHHRMPDSSASRYRIGEYESSSRVFEOKSLRRYYSRTAQRIDVRRPARRSSRYSKTSLDLPSPDGG      | 188 |
| Scryophilus | SARRNLTVAETELKATLPLSLDERRLSRRSHQDVGVPVQAKLSE...NRITSGNTNPLVFEOKSLRRYYSNRATAQRLEFRRSGGPPSSRFESRASEINTTDDA  | 186 |
| Soctosporus | STRNNTLFAETELKATLPLSLDEHRLSRSSPQDFGIPVDGNRES...YRITSRNSNPLVFEOKSLRRYYSNRATAQRIDNGRSGGPPSSRFESRSTTSGVSAVNA | 189 |
| Sjaponicus  | RHRRERQRRVTVSSGSEETFEIPLKSRRRHGSRNRDRDSSFARNPNRISFVDNDQVLEVDAAEFISDVGDALHEDSRFSDEPEGGTSSLNDASYPEVYTG      | 198 |
| Spombe.S1f1 | RFVDDSLTPHTDINRFRVSDDDDSGVGSSSPDQMSRNNLNLINRRTTSTSSKPYAKEQQLISSMAPVQKNSSTAREQYVAPALSFAEPVET               | 287 |
| Scryophilus | RFADENDVPTNNDVNNRRTDPPFESGR.TSFEFETSEMAGRRNSINLQARMKPMDSK.LVSKNGQPMRVSQITPESSPQNVLGQEANPLTARFSGN          | 283 |
| Soctosporus | RFADENDDIATPKNSRNFADSDPEFGR.TSFEFERSETARKNSLNFQDMKPIGTR.MASKNGQSMRASELTERGSLSTAPESSEANSPPLAFTVSGS         | 287 |
| Sjaponicus  | TTLPNATGPGILAKTRRSLDAVSRLEPDPYLTNDIKRTRSVGNVSTPRLQEPESYRDALSKQPQEQQTKGKQTSKVCAAVHDGFSLKKHILNALRK          | 298 |
| Spombe.S1f1 | QHNHMPKTPPLRGSTVMNGSLIGPYSSSSNATGMVYSGKSHSSSTRFHFSSVSSQFAEEFVGSSSHGRQ.....QDSYIAFDSDSESYRRVR              | 379 |
| Scryophilus | STSYASNEYAFEDQPTAAILSES.KYANAPAFEQNIQYENATMDRRRFFETVDF..GGNMASGVHTN.....ADDPYMDDSDSESYRRVR                | 374 |
| Soctosporus | SFGYLFNDHILETQSRSGVLSER.HSNIPAWQPDTAAPHVPTONRQPLETDLNS..SDEMGGSDPYMD.....VREFFVDDSDSESYRRVR               | 374 |
| Sjaponicus  | RSMEMENPREELQLGSSPVRSTAHQRNSSQFENASFRVYVPEEPEEMPVVKNVPDNDHWQRVYRNSLLINPDREMEPRRAIVAADDSDSESYRRVR          | 398 |
| Spombe.S1f1 | QOYLSKFRRLSDKNRYSIFSEFPG..GDFSSQSNVRRSNT..VRPTSEFYEKLHIKRN.DNPSFCALPYETITQERKPV..VKDSIKTVKPEKFKKSE        | 472 |
| Scryophilus | QOYLSKFRVVKPTDRYSILSNTAS..GDFPRASQANLNQNN..CRPFSHFYEKLHIKNNNNNSFCALPYETITPAKRPE...MPTQPGQATPQKPKRGL       | 462 |
| Soctosporus | QOYLQTEF.RARSNRYSVGSNTAS..GDFPRASQANLNHN...CRPFSHFYEKLHIKNNPKNNNSFCALPYETITAPATRE...LVVTHPEQASPKKNSSE     | 463 |
| Sjaponicus  | QOYLSRANTVHSFRLSYFISVGVGTARFSSNRTRGTRDARNSLRFSQMVYEKLHIKRN.SNPSLITAMPYQSVATPNPVTQKQRLSASQKSGMERKRRNS      | 497 |
| Spombe.S1f1 | FKKLMKLSHLEFD                                                                                             | 485 |
| Scryophilus | FKRLFQKVSRIEFD                                                                                            | 474 |
| Soctosporus | LRKFAKKERIEFD                                                                                             | 475 |
| Sjaponicus  | IRRFFKLRLEK                                                                                               | 510 |

**Supplemental Figure S2.** Protein sequence alignment for Slf1 and potential homologs in fission yeast species. Slf1 proteins are only found in fission yeasts. Residues highlighted in black are identical, and residues in gray are 75% identical (*i.e.* conserved in 3 out of 4 species). C-terminal lysine-rich region (aa. 451-485) of Slf1 is underlined with lysine residues marked by asterisks.

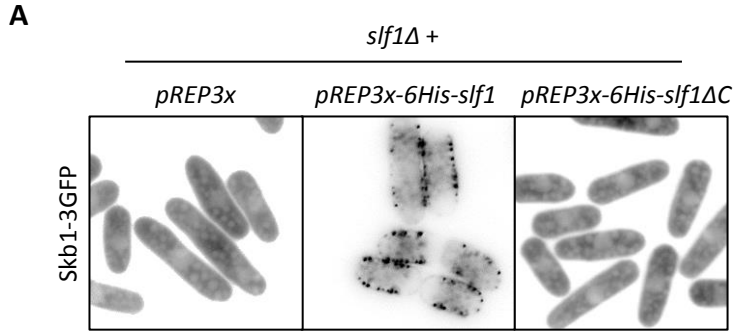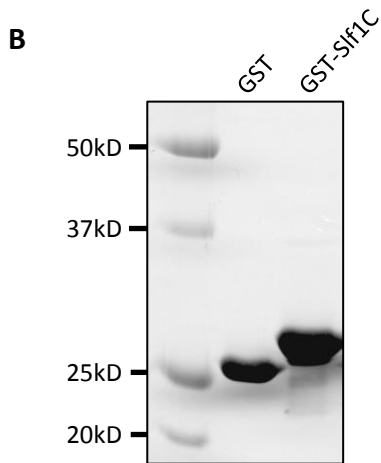

**Supplemental Figure S3. (A)** Localization of Skb1-3GFP in *slf1Δ* expressing indicated constructs. The proteins were expressed at 32°C for 18 hours. Images are inverted middle focal planes. Note the Slf1ΔC cannot anchor Skb1-3GFP to plasma membrane. **(B)** Coomassie staining of purified recombinant proteins used in liposome pelleting assays. Slf1C is the amino acid 451-485.
